# Supplementary material for: Specific Antibody Fragment Ligand Traps Blocking FGF1 Activity
Source: MDPI journal article supplement (doi:10.3390/ijms19092470), 2018-08-21
Supplement: s1 [file s1]

# Specific Antibody Fragment Ligand Traps Blocking FGF1 Activity

Table S1. Yields of individual scFv preparations.

| Protein Name | Protein Yield [mg Protein/L Culture] |
|--------------|--------------------------------------|
| scFvA        | 3.2                                  |
| scFvC        | 6.8                                  |
| scFvD        | 29.7                                 |

Table S2. Efficiency of individual scFv-Fc preparations.

| Protein Name | Protein Yield [mg Protein/L Culture] |
|--------------|--------------------------------------|
| scFvA-Fc     | 10.5                                 |
| scFvC-Fc     | 29.2                                 |
| scFvD-Fc     | 6.6                                  |

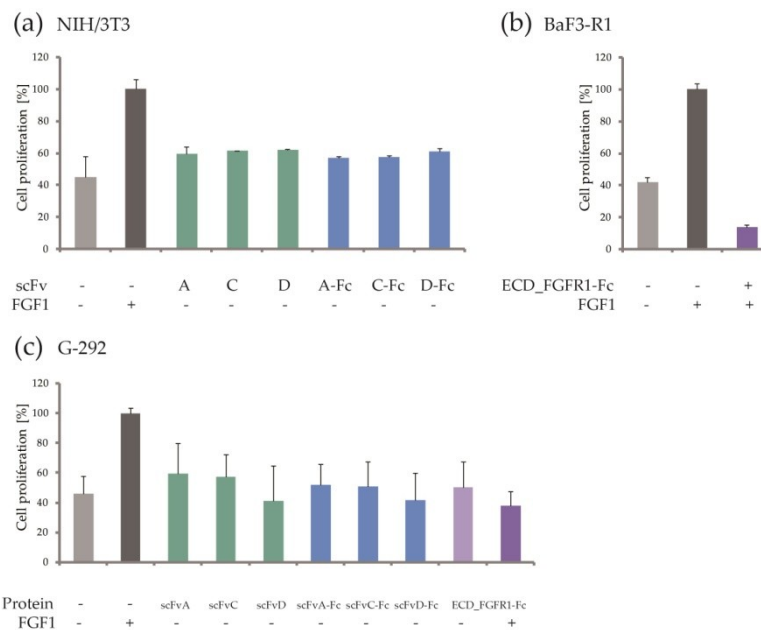

**Figure S1.** Influence on cell proliferation of selected antibody fragments and ECD\_FGFR1-Fc. **(a)** NIH/3T3 cells were serum starved for 24 hours and incubated with scFvs (green) or scFvs-Fc (blue) in the absence of FGF1, with NIH/3T3 without any treatment (light grey), and NIH/3T3 incubated with FGF1 and heparin only (dark grey), serving as controls. After 48 hours of incubation, the cell proliferation level was determined. **(b)** BaF3-R1 cells were starved for 24 hours and incubated with ECD\_FGFR1-Fc (dark purple) in the presence of FGF1, with BaF3-R1 without any treatment (light grey), and cells incubated with FGF1 and heparin only (dark grey), serving as controls. **(c)** G-292 cells were serum starved for 24 hours and incubated with scFvs (green), scFvs-Fc (blue), or ECD\_FGFR1-Fc (light purple) in the absence of FGF1, with cells without any treatment (light grey), and G-292 incubated with FGF1 and ECD\_FGFR1-Fc (dark purple), or FGF1 and heparin only (dark grey), serving as controls. The error bars show standard deviation.
